# Supplementary material for: Target Site Recognition by a Diversity-Generating Retroelement
Source: PubMed Central journal article supplement (PMC3240598; doi:10.1371/journal.pgen.1002414), 2011-12-15
Supplement: pgen.1002414.s001.pdf [file pgen.1002414.s001.pdf]

**A**

└─ VR

WT5' ACGCCAGCCCGCTGCTGCGCTATTCGGCGGCGCCTGGAACGGCACGTCGCTCTCGGGTT 60  
5'Δ105 ACGCCAGCCCGCTGCTGCGCTATTCGGCGGCGCCTGGAACGGCACGTCGCTCTCGGGTT 60  
5'Δ133 GAAATGTTCCGCTGCTGCGCTATTCGGCGGCGCCTGGAACGGCACGTCGCTCTCGGGTT 60  
5'Δ153 CGCCACGAGCGCGTGAACAGAACATGTTTCGCGCCTGGAACGGCACGTCGCTCTCGGGTT 60  
\* \* \*\* \* \* \*\*\*\*\*

WT CTGCGCTGCGCTCTGGTACAGCGGGCCGTCGTTCTCGTTCGCGTTCTTCGGGGCGCGCG 120  
5'Δ105 CTGCGCTGCGCTCTGGTACAGCGGGCCGTCGTTCTCGTTCGCGTTCTTCGGGGCGCGCG 120  
5'Δ133 CTGCGCTGCGCTCTGGTACAGCGGGCCGTCGTTCTCGTTCGCGTTCTTCGGGGCGCGCG 120  
5'Δ153 CTGCGCTGCGCTCTGGTACAGCGGGCCGTCGTTCTCGTTCGCGTTCTTCGGGGCGCGCG 120  
\*\*\*\*\*

WT CGCTCTGTGACCACCTGATTCTTG 144  
5'Δ105 CGCTCTGTGACCACCTGATTCTTG 144  
5'Δ133 CGCTCTGTGACCACCTGATTCTTG 144  
5'Δ153 CGCTCTGTGACCACCTGATTCTTG 144  
\*\*\*\*\*

**B**

WT3' CGCTGCTGCGCTATTCGGCGGCGCCTGGAACGGCACGTCGCTCTCGGGTTCTCGCGCTGC 60  
3'Δ47 CGCTGCTGCGCTATTCGGCGGCGCCTGGAACGGCACGTCGCTCTCGGGTTCTCGCGCTGC 60  
3'Δ68 CGCTGCTGCGCTATTCGGCGGCGCCTGGAACGGCACGTCGCTCTCGGGTTCTCGCGCTGC 60  
3'Δ82 CGCTGCTGCGCTATTCGGCGGCGCCTGGAACGGCACGTCGCTCTCGGGTTCTCGCGCTGC 60  
3'Δ103 CGCTGCTGCGCTATTCGGCGGCGCCTGGAACGGCACGTCGCTCTCGGGTTCTCGCGCTGC 60  
\*\*\*\*\*

WT3' GCTCTGGTACAGCGGGCCGTCGTTCTCGTTCGCGTTCTTCGGGGCGCGGGCGTCTGTGA 120  
3'Δ47 GCTCTGGTACAGCGGGCCGTCGTTCTCGTTCGCGTTCTTCGGGGCGCGGGCGTCTGTGA 120  
3'Δ68 GCTCTGGTACAGCGGGCCGTCGTTCTCGTTCGCGTTCTTCGGGGCGCGGGCGTCTGTGA 120  
3'Δ82 GCTCTGGTACAGCGGGCCGTCGTTCTCGTTCGCGTTCTTCGGGGCGCGGGCGTCTGTGA 120  
3'Δ103 GCTCTGGTACAGCGGGCCGTCGTTCTCGTTCGCGTTCTTCGGGGCGCGGGCGTCTGTGA 120  
\*\*\*\*\*

Hairpin

WT3' CCACCTGATTCTTGAGTAGCGGGGCCGAAAGGCCCGCCAAGGCAACCGATGGAA 175  
3'Δ47 CCACCTGATTCTTGAGTAGCGGGGCCGAAAGGCCCGCCAAGGCAACCGTGCAG 175  
3'Δ68 CCACCTGATTCTTGAGTAGCGGGGCCACTGCAGCGGTTTCTCGCCTCGTGGTCC 175  
3'Δ82 CCACCTGATTCTTGCTGCAGCGGTTTCTCGCCTCGTGGTCCGGTCAATGCGCAATG 175  
3'Δ103 GTTTCTCGCCTCGTGGTCCGGTCAATGCGCAATGGGCCGACACCCACAACCTTTT 175  
\* \* \* \*
