# Supplementary material for: Target Site Recognition by a Diversity-Generating Retroelement
Source: PubMed Central journal article supplement (PMC3240598; doi:10.1371/journal.pgen.1002414), 2011-12-15
Supplement: pgen.1002414.s002.pdf [file pgen.1002414.s002.pdf]

**A**

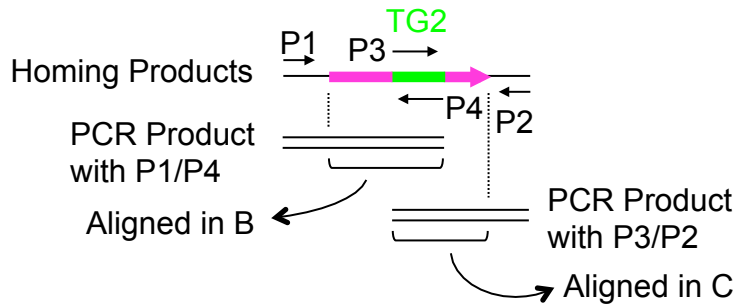

**B**

```

B4  GCGCCTGGAACGGCACGTCGCTCTCGGGTTCTCGCGCTGCGCTATTCGGCGGCGGGTCTG 60
D4  GCGCCTGGAACGGCACGTCGCTCTCGGGTTCTCGCGCTGCGCTATTCGGCGGCAGATCTG 60
E4  GCGCCTGGAACGGCACGTCGCTCTCGGGTTCTCGCGCTGCGCTATTCGGCGGCAGATCTG 60
F4  GCGCCTGGAACGGCACGTCGCTCTCGGGTTCTCGCGCTGCGCTATTCGGCGGCAGATCTG 60
G4  GCGCCTGGAACGGCACGTCGCTCTCGGGTTCTCGCGCTGCGCTATTCGGCGGCAGGTCTG 60
H4  GCGCCTGGAACGGCACGTCGCTCTCGGGTTCTCGCGCTGCGCTATTCGGCGGCAGGTCTG 60

```

\*\*\*\*\*  
 \*\*\*\*\*  
 \*\*\*\*\*

Parental VR-derived TR-derived

```

B4  TCTCCGTTTGTGTTCTGTGCTAAGCTT 88
D4  TCTGCGTTTGTGTTCTGTGCTAAGCTT 88
E4  TCTGCGTTTGTGTTCTGTGCTAAGCTT 88
F4  TCTGCGTTTGTGTTCTGTGCTAAGCTT 88
G4  TCTGCGTTTGTGTTCTGTGCTAAGCTT 88
H4  TCTGCGTTTGTGTTCTGTGCTAAGCTT 88

```

\*\*\*  
 \*\*\*\*\*  
 \*\*\*\*\*

P4

---

```

A4  GCGCCTGGAACGGCACGTCGCTCTCGGGTTCTCGCGCTGCGCTCTGCTGCGTTTGTGTT
      Parental VR-derived TR-derived
      CCTGTGCTAAGCTT 74
      P4

```

---

```

C4  GCGCCTGGAACGGCACGTCGCTCTCGGGTTCTCGCGCTTCGCGGGCGGTTCTGTCTGCGT
      Parental VR-derived TR-derived
      TTGTGTTCTGTGCTAAGCTT 81
      P4

```

**C**

TG2VR ---AGATCTGTCTGCGTTTGTGTTCCCTGTGCTAGCCATCGGGGCGCGGGCGTCTGTGAC 57  
A9 TCTAGATCTGTCTGCGTTTGTGTTCCCTGTGCGACCCATCGGGGCGCGGGCGTCTGTGGC 60  
B9 TCTAGATCTGTCTGCGTTTGTGTTCCCTGTGCTAGCCATCGGGGCGCGGGCGTCTGTGAC 60  
C9 TCTAGATCTGTCTGCGTTTGTGTTCCCTGTGCTAGCCTTCGGGGCGCGGGCGTCTGTGAC 60  
D9 TCTAGATCTGTCTGCGTTTGTGTTCCCTGTGCTAGCCATCGGGGCGCGGGCGTCTGTGAC 60  
E9 TCTAGATCTGTCTGCGTTTGTGTTCCCTGTGCTAGCCATCGGGGCGCGGGCGTCTGTGAC 60  
F9 TCTAGATCTGTCTGCGTTTGTGTTCCCTGTGTTAGCCATCGGGGCGCGGGCGTCTGTGAC 60  
G9 TCTAGATCTGTCTGCGTTTGTGTTCCCTGTGCTAGCCATCGGGGCGCGGGCGTCTGTGAC 60  
H9 TCTAGATCTGTCTGCGTTTGTGTTCCCTGTGCTAGCCGTCGGGGCGCGGGCGTCTGTGAC 60

\*\*\*\*\*  
P3 → G/C

TG2VR CACCTGATTCTTG 70  
A9 CACCTGATTCTTG 73  
B9 CACCTGATTCTTG 73  
C9 CACCTGATTCTTG 73  
D9 CACCTGATTCTTG 73  
E9 CACCTGATTCTTG 73  
F9 CACCTGATTCTTG 73  
G9 CACCTGATTCTTG 73  
H9 CACCTGATTCTTG 73

\*\*\*\*\*
