# Supplementary material for: Target Site Recognition by a Diversity-Generating Retroelement
Source: PubMed Central journal article supplement (PMC3240598; doi:10.1371/journal.pgen.1002414), 2011-12-15
Supplement: pgen.1002414.s003.pdf [file pgen.1002414.s003.pdf]

**A**

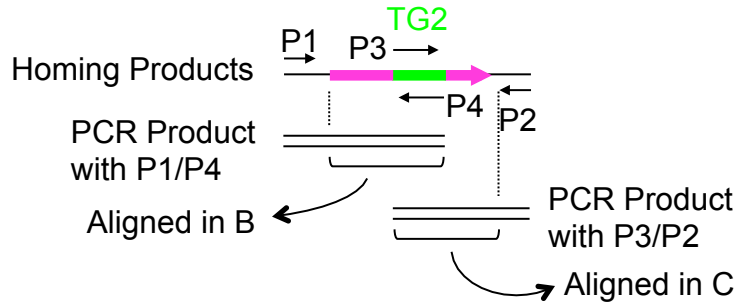

**B**

```

VR5' end      CGCTGCTGCGCTATTCGGCGGCAGATCTGTCTGCGTTTGTGTTCCCTGTGCTAAGCTT 57
R2HP5' -01   CGCTGCTGCGCTATTCGGCGGCAGTTCTGTCTGCGTTTGTGTTCCCTGTGCTAAGCTT 57
R2HP5' -02   CGCTGCTGCGCTATTCGGCGGCAGGTCTGTCTGCGTTTGTGTTCCCTGTGCTAAGCTT 57
R2HP5' -03   CGCTGCTGCGCTATTCGGCGGCAGATCTGTCTGCGTTTGTGTTCCCTGTGCTAAGCTT 57
R2HP5' -04   CGCTGCTGCGCTATTCGGCGGCAGATCTGTCTGCGTTTGTGTTCCCTGTGCTAAGCTT 57
R2HP5' -05   CGCTGCTGCGCTATTCGGCGGCAGATCTGTCTGCGTTTGTGTTCCCTGTGCTAAGCTT 57
R2HP5' -06   CGCTGCTGCGCTATTCGGCGGCAGATCTGTCTGCGTTTGTGTTCCCTGTGCTAAGCTT 57
R2HP5' -07   CGCTGCTGCGCTATTCGGCGGCAGATCTGTCTGCGTTTGTGTTCCCTGTGCTAAGCTT 57
R2HP5' -08   CGCTGCTGCGCTATTCGGCGGCAGATCTGTCTGCGTTTGTGTTCCCTGTGCTAAGCTT 57
R2HP5' _09   CGCTGCTGCGCTATTCGGCGGCAGATCTGTCTGCGTTTGTGTTCCCTGTGCTAAGCTT 57
R2HP5' _10   CGCTGCTGCGCTATTCGGCGGCAGGTCTGTCTGCGTTTGTGTTCCCTGTGCTAAGCTT 57
R2HP5' _11   CGCTGCTGCGCTATTCGGCGGCAGATCTGTCTGCGTTTGTGTTCCCTGTGCTAAGCTT 57
R2HP5' _12   CGCTGCTGCGCTATTCGGCGGCAGATCTGTCTGCGTTTGTGTTCCCTGTGCTAAGCTT 57
R2HP5' _13   CGCTGCTGCGCTATTCGGCGGCAGCTCTGTCTGCGTTTGTGTTCCCTGTGCTAAGCTT 57
R2HP5' _14   CGCTGCTGCGCTATTCGGCGGCAGATCTGTCTGCGTTTGTGTTCCCTGTGCTAAGCTT 57
R2HP5' _15   CGCTGCTGCGCTATTCGGCGGCAGTTCTGTCTGCGTTTGTGTTCCCTGTGCTAAGCTT 57
*****
*****←*****
P4
  
```

C

```

wtHP3' End TCTAGATCTGTCTGCGTTTGTGTTCCCTGTGCTAGCCATCGGGGCGCGGGCGTCTGTGAC 60
R2HP3' _01 TCTAGATCTGTCTGCGTTTGTGTTTCTGTGCTAGCCATCGGGGCGCGGGCGTCTGTGAC 60
R2HP3' _02 TCTAGATCTGTCTGCGTTTGTGTTCCCTGTGCTAGCCATCGGGGCGCGGGCGTCTGTGAC 60
R2HP3' _03 TCTAGATCTGTCTGCGTTTGTGTTCCCTGTGCTAGCCATCGGGGCGCGGGCGTCTGTGAC 60
R2HP3' _04 TCTAGATCTGTCTGCGTTTGTGTTCCCTGTGCTAGCCATCGGGGCGCGGGCGTCTGTGAC 60
R2HP3' _05 TCTAGATCTGTCTGCGTTTGTGTTCCCTGTGCTAGCCATCGGGGCGCGGGCGTCTGTGAC 60
R2HP3' _06 TCTAGATCTGTCTGCGTTTGTGTTCCCTGTGCTAGCCATCGGGGCGCGGGCGTCTGTGAC 60
R2HP3' _07 TCTAGATCTGTCTGCGTTTGTGTTCCCTGTGCTAGCCATCGGGGCGCGGGCGTCTGTGAC 60
R2HP3' _08 TCTAGATCTGTCTGCGTTTGTGTTCCCTGTGCTAGCCATCGGGGCGCGGGCGTCTGTGAC 60
R2HP3' _09 TCTAGATCTGTCTGCGTTTGTGTTCCCTGTGCTAGCCATCGGGGCGCGGGCGTCTGTGAC 60
R2HP3' _10 TCTAGATCTGTCTGCGTTTGTGTTCCCTGTGCTAGCCATCGGGGCGCGGGCGTCTGTGAC 60
R2HP3' _11 TCTAGATCTGTCTGCGTTTGTGTTCCCTGTGCTAGCCATCGGGGCGCGGGCGTCTGTGAC 60
R2HP3' _12 TCTAGATCTGTCTGCGTTTGTGTTCCCTGTGCTAGCCATCGGGGCGCGGGCGTCTGTGAC 60
R2HP3' _13 TCTAGATCTGTCTGCGTTTGTGTTCCCTGTGCTAGCCATCGGGGCGCGGGCGTCTGTGAC 60
R2HP3' _14 TCTAGATCTGTCTGCGTTTGTGTTCCCTGTGCTAGCCATCGGGGCGCGGGCGTCTGTGAC 60
R2HP3' _15 TCTAGATCTGTCTGCGTTTGTGTTCCCTGTGCTGTCCGTCGGGGCGCGGGCGTCTGTGAC 60
R2HP3' _16 TCTAGATCTGTCTGCGTTTGTGTTCCCTGTGCTGTCCGTCGGGGCGCGGGCGTCTGTGAC 60
R2HP3' _17 TCTAGATCTGTCTGCGTTTGTGTTCCCTGTGCTAGCCATCGGGGCGCGGGCGTCTGTGAC 60
R2HP3' _18 TCTAGATCTGTCTGCGTTTGTGTTCCCTGTGCTAGCCATCGGGGCGCGGGCGTCTGTGAC 60
R2HP3' _19 TCTAGATCTGTCTGCGTTTGTGTTCCCTGTGCTAGCCATCGGGGCGCGGGCGTCTGTGAC 60
R2HP3' _20 TCTAGATCTGTCTGCGTTTGTGTTCCCTGTGCTAGCCATCGGGGCGCGGGCGTCTGTGAC 60

```

\*\*\*\*\*>\*\*\*\*\* \*\* \*\*\*\*\*

P3

G/C

```

wtHP3' End CACCTGATTCTTGAGTAGGCCCGGAAAGGCCCGCCAAAGGCAACCGATG 111
R2HP3' _01 CACCTGATTCTTGAGTAGGCCCGGAAACCGGGGCCAAAGGCAACCGATG 111
R2HP3' _02 CACCTGATTCTTGAGTAGGCCCGGAAACCGGGGCCAAAGGCAACCGATG 111
R2HP3' _03 CACCTGATTCTTGAGTAGGCCCGGAAACCGGGGCCAAAGGCAACCGATG 111
R2HP3' _04 CACCGATTCTTGAGTAGGCCCGGAAACCGGGGCCAAAGGCAACCGATG 111
R2HP3' _05 CACCTGATTCTTGAGTAGGCCCGGAAACCGGGGCCAAAGGCAACCGATG 111
R2HP3' _06 CACCTGATTCTTGAGTAGGCCCGGAAACCGGGGCCAAAGGCAACCGATG 111
R2HP3' _07 CACCTGATTCTTGAGTAGGCCCGGAAACCGGGGCCAAAGGCAACCGATG 111
R2HP3' _08 CACCTGATTCTTGAGTAGGCCCGGAAACCGGGGCCAAAGGCAACCGATG 111
R2HP3' _09 CACCTGATTCTTGAGTAGGCCCGGAAACCGGGGCCAAAGGCAACCGATG 111
R2HP3' _10 CACCTGATTCTTGAGTAGGCCCGGAAACCGGGGCCAAAGGCAACCGATG 111
R2HP3' _11 CACCTGATTCTTGAGTAGGCCCGGAAACCGGGGCCAAAGGCAACCGATG 111
R2HP3' _12 CACCTGATTCTTGAGTAGGCCCGGAAACCGGGGCCAAAGGCAACCGATG 111
R2HP3' _13 CACCTGATTCTTGAGTAGGCCCGGAAACCGGGGCCAAAGGCAACCGATG 111
R2HP3' _14 CACCTGATTCTTGAGTAGGCCCGGAAACCGGGGCCAAAGGCAACCGATG 111
R2HP3' _15 CACCTGATTCTTGAGTAGGCCCGGAAACCGGGGCCAAAGGCAACCGATG 111
R2HP3' _16 CACCTGATTCTTGAGTAGGCCCGGAAACCGGGGCCAAAGGCAACCGATG 111
R2HP3' _17 CACCTGATTCTTGAGTAGGCCCGGAAACCGGGGCCAAAGGCAACCGATG 111
R2HP3' _18 CACCTGATTCTTGAGTAGGCCCGGAAACCGGGGCCAAAGGCAACCGATG 111
R2HP3' _19 CACCTGATTCTTGAGTAGGCCCGGAAACCGGGGCCAAAGGCAACCGATG 111
R2HP3' _20 CACCTGATTCTTGAGTAGGCCCGGAAACCGGGGCCAAAGGCAACCGATG 111

```

\*\*\*\* \*\*\*\*\*>\*\*\*\*\* \*\*\*\*\*

Hairpin
