# Supplementary material for: Target Site Recognition by a Diversity-Generating Retroelement
Source: PubMed Central journal article supplement (PMC3240598; doi:10.1371/journal.pgen.1002414), 2011-12-15
Supplement: pgen.1002414.s004.pdf [file pgen.1002414.s004.pdf]

TR99VR CGCTGCTGCGCTATTCGGCGGC AACTGGAACAACACGTCGAACTCGGGTTCTCGCGCTGC 60  
 wtTSP1 CGCTGCTGCGCTATTCGGCGGC CGCTGGAGCAACACGTCGAGCTCGGGTTCTCGCGCTGC 60  
 wtTSP2 CGCTGCTGCGCTATTCGGCGGC TCTGGAGCAACACGTCGTA CTCTCGGGTTCTCGCGCTGC 60  
 wtTSP3 CGCTGCTGCGCTATTCGGCGGC TCTGGAGCAACACGTCGAACTCGGGTTCTCGCGCTGC 60  
 wtTSP4 CGCTGCTGCGCTGTTTCGGCGGC TCTGGAGCAACACGTCGAACTCGGGTTCTCGCGCTGC 60  
 wtTSP5 CGCTGCTGCGCTATTCGGCGGC TCTGGAGCAACACGTCGAACTCGGGTTCTCGCGCTGC 60

\*\*\*\*\*

VR

TR99VR GAACTGGAACAACGGGCCGTCGAACTCGAACCGCAACATCGGGGCGCGGGCGTCTGTGA 120  
 wtTSP1 GTACTGGACAGCGGGCCGTCGTA CTCTCGTTCGCGTTCTTCGGGGCGCGGGCGTCTGTGA 120  
 wtTSP2 GTACTGGAGCTACGGGCCGTCGCTCTCGCTCGCGTTCA TCGGGGCGCGGGCGTCTGTGA 120  
 wtTSP3 GTACTGGTACAACGGGCCGTCGAACTCGGCCGCGTACTTCGGGGCGCGGGCGTCTGTGA 120  
 wtTSP4 GTACTGGAGCGCCGGGCCGTCGTTCTCGTTCGCGTTCTTCGGGGCGCGGGCGTCTGTGA 120  
 wtTSP5 GTACTGGAAC TACGGGCCGTCGTA CTCTCGAACCGCTACATCGGGGCGCGGGCGTCTGTGA 120

\* \* \* \* \*

VR

TR99VR CCACCTGATTCTTGAGTAGCGGGGCCGAAAGGCCCGCC AAGGCAACCGATG 172  
 wtTSP1 CCACCTGATTCTTGAGTAGCGGGGCCGAAAGGCCCGCC AAGGCAACCGATG 172  
 wtTSP2 CCACCTGATTCTTGAGTAGCGGGGCCGAAAGGCCCGCC AAGGCAACCGATG 172  
 wtTSP3 CCACCTGATTCTTGAGTAGCGGGGCCGAAAGGCCCGCC AAGGCAACCGATG 172  
 wtTSP4 CCACCTGATTCTTGAGTAGCGGGGCCGAAAGGCCCGCC AAGGCAACCGATG 172  
 wtTSP5 CCACCTGATTCTTGAGTAGCGGGGCCGAAAGGCCCGCC AAGGCAACCGATG 172

\*\*\*\*\*

VR

WT Hairpin
