# Supplementary material for: Target Site Recognition by a Diversity-Generating Retroelement
Source: PubMed Central journal article supplement (PMC3240598; doi:10.1371/journal.pgen.1002414), 2011-12-15
Supplement: pgen.1002414.s005.pdf [file pgen.1002414.s005.pdf]

TR99VR CGCTGCTGCGCTATTCGGCGGC AACTGGAACAACACGTCGAACTCGGGTTCTCGCGCTGC 60  
 MutTSP6 CGCTGCTGCGCTATTCGGCGGCAGCTGGAGCAACACGTCGAACTCGGGTTCTCGCGCTGC 60  
 MutTSP7 CGCTGCTGCGCTATTCGGCGGCTCCTGGAGCAACTCGTCGGCCTCGGGTTCTCGCGCTGC 60  
 MutTSP8 CGCTGCTGCGCTATTCGGCGGCGCCTGGAGCAACACGTCGAACTCGGGTTCTCGCGCTGC 60  
 MutTSP9 CGCTGCTGCGCTATTCGGCGGCAGCTGGAGCAACACGTCGAACTCGGGTTCTCGCGCTGC 60  
 MutTSP10 CGCTGCTGCGCTATTCGGCGGCGCCTGGAGCAACACGTCGTCCTCGGGTTCTCGCGCTGC 60

\*\*\*\*\*

VR

TR99VR GAACTGGAACAACGGGCCGTCGAACTCGAACGCGAACATCGGGGCGCGGGCGTCTGTGA 120  
 MutTSP6 GTACTGGTACTACGGGCCGTCGTACTCGAGCGCGTACCTCGGGGCGCGGGCGTCTGTGA 120  
 MutTSP7 GTACTGGGACTACGGGCCGTCGACCTCGTGC GCGTACATCGGGGCGCGGGCGTCTGTGA 120  
 MutTSP8 GTACTGGAGCTACGGGCCGTCGAGCTCGGGCGCGTACTTCGGGGCGCGGGCGTCTGTGA 120  
 MutTSP9 GTACTGGAGCAGCGGCGTCGAACTCGTTCGCGTTCTTCGGGGCGCGGGCGTCTGTGA 120  
 MutTSP10 GGCCTGGAGCTACGGGCCGTCGGGCTCGGGCGCGTTTCATCGGGGCGCGGGCGTCTGTGA 120

\* \*\*\*\* \* \*\*\*\*\* \*\*\*\*\* \* \*\*\*\*\*

VR

TR99VR CCACCTGATTCTTGTAGTAGCGGGGCCGAAAGGCCCGCC AAGGCAACCGATG 172  
 MutTSP6 CCACCTGATTCTTGTAGTAGCGGGGCCGAAACCGGGGCC AAGGCAACCGATG 172  
 MutTSP7 CCACCTGATTCTTGTAGTAGCGGGGCCGAAACCGGGGCC AAGGCAACCGATG 172  
 MutTSP8 CCACCTGATTCTTGTAGTAGCGGGGCCGAAACCGGGGCC AAGGCAACCGATG 172  
 MutTSP9 CCACCTGATTCTTGTAGTAGCGGGGCCGAAACCGGGGCC AAGGCAACCGATG 172  
 MutTSP10 CCACCTGATTCTTGTAGTAGCGGGGCCGAAACCGGGGCC AAGGCAACCGATG 172

\*\*\*\*\*

VR

Hairpin Region
