# Supplementary material for: Target Site Recognition by a Diversity-Generating Retroelement
Source: PubMed Central journal article supplement (PMC3240598; doi:10.1371/journal.pgen.1002414), 2011-12-15
Supplement: pgen.1002414.s006.pdf [file pgen.1002414.s006.pdf]

TR99VR CGCTGCTGCGCTATTCGGCGGCAACTGGAACAACACGTCGAACTCGGGTTCTCGCGCTGC 60  
 RevTSP11 CGCTGCTGCGCTATTCGGCGGCGCCTGGGCCAACACGTCGAACTCGGGTTCTCGCGCTGC 60  
 RevTSP12 CGCTGCTGCGCTATTCGGCGGCGCCTGGAGCAACACGTCGTAATCGGGTTCTCGCGCTGC 60  
 RevTSP13 CGCTGCTGCGCTATTCGGCGGCTCCTGGAACAACACGTCGAACTCGGGTTCTCGCGCTGC 60  
 RevTSP14 CGCTGCTGCGCTATTCGGCGGCTCCTGGAGCAACACGTCGAGCTCGGGTTCTCGCGCTGC 60  
 RevTSP15 CGCTGCTGCGCTATTCGGCGGCGCCTGGCTCCTCACGTCGTTCTCGGGTTCTCGCGCTGC 60

\*\*\*\*\*

VR

TR99VR GAACTGGAACAACGGGCCGTCGAACTCGAACGCGAACATCGGGGCGCGGGCGTCTGTGA 120  
 RevTSP11 GTACTGGAGCTACGGGCCGTCGTCCTCGTACGCGTACATCGGGGCGCGGGCGTCTGTGA 120  
 RevTSP12 GTACTGGAACAACGGGCCGTCGTTCTCGTTCGCGTTCTTCGGGGCGCGGGCGTCTGTGA 120  
 RevTSP13 GTACTGGGCGCTCGGGCCGTCGAACTCGTACGCGTACATCGGGGCGCGGGCGTCTGTGA 120  
 RevTSP14 GTACTGGAGCTACGGGCCGTCGGCCTCGAACGCGTACCTCGGGGCGCGGGCGTCTGTGA 120  
 RevTSP15 GTACTGGAGCTACGGGCCGTCGAACTCGCACGCGTACATCGGGGCGCGGGCGTCTGTGA 120

\* \* \* \* \*

VR

TR99VR CCACCTGATTCTTGAGTAGCGGGGCCGAAAGGCCCGCCAAAGGCAACCGATG 172  
 RevTSP11 CCACCTGATTCTTGAGTAGGCCCGGGAAACCGGGGCCAAAGGCAACCGATG 172  
 RevTSP12 CCACCTGATTCTTGAGTAGGCCCGGGAAACCGGGGCCAAAGGCAACCGATG 172  
 RevTSP13 CCACCTGATTCTTGAGTAGGCCCGGGAAACCGGGGCCAAAGGCAACCGATG 172  
 RevTSP14 CCACCTGATTCTTGAGTAGGCCCGGGAAACCGGGGCCAAAGGCAACCGATG 172  
 RevTSP15 CCACCTGATTCTTGAGTAGGCCCGGGAAACCGGGGCCAAAGGCAACCGATG 172

\*\*\*\*\*

VR

Hairpin StemRev
