# Supplementary material for: Target Site Recognition by a Diversity-Generating Retroelement
Source: PubMed Central journal article supplement (PMC3240598; doi:10.1371/journal.pgen.1002414), 2011-12-15

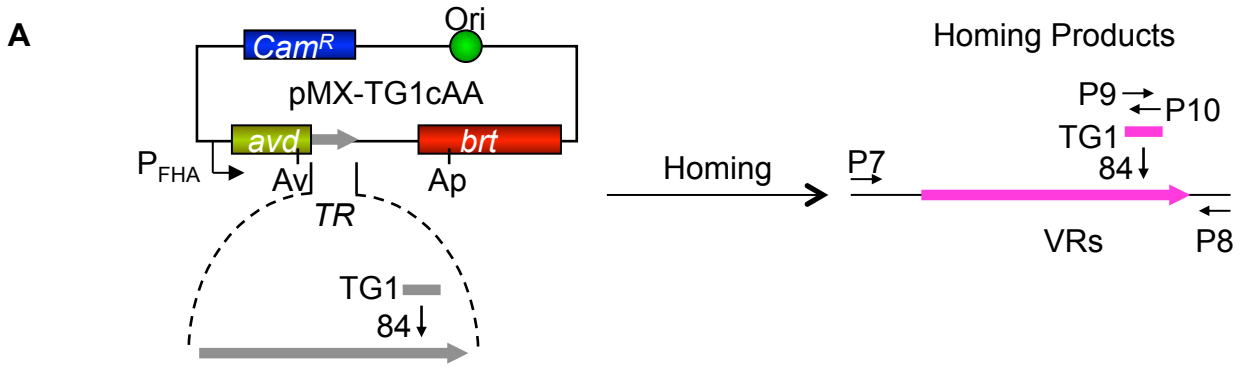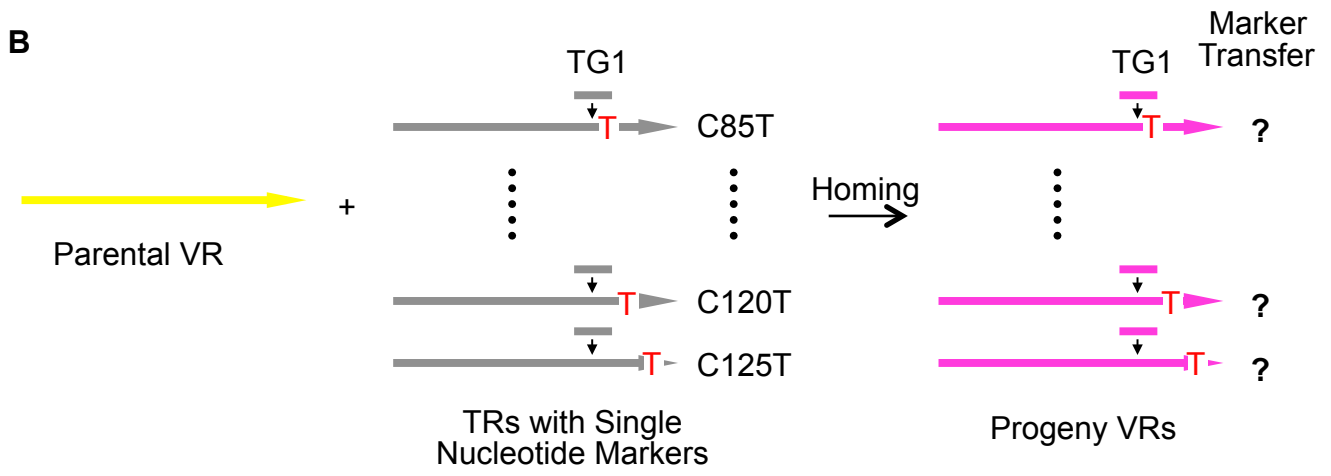

Supplement: pgen.1002414.s008.pdf [file pgen.1002414.s008.pdf]
