# Supplementary material for: Target Site Recognition by a Diversity-Generating Retroelement
Source: PubMed Central journal article supplement (PMC3240598; doi:10.1371/journal.pgen.1002414), 2011-12-15
Supplement: pgen.1002414.s009.pdf [file pgen.1002414.s009.pdf]

KmHP CGCTTGCAGTTTCATTTGATGCTCGATGAGTTTTTCTAATAAGCTAGCCATCGGGGCGCG 60  
 RP1-01 CGCTTGCAGTTCCATTTGATGCTCGATGAGTTTTTCTAATAAGCTGGCCGTCGGGGCGCG 60  
 RP1-02 CGCTTGCAGTTTCATTTGATGCTCGATGAGTTTTTCTAATAAGCTAGCCATCGGGGCGCG 60  
 RP1-03 CGCTTGCAGTTTCATTTGATGCTCGATGAGTTTTTCTAGTAAGCTAGCCATCGGGGCGCG 60  
 RP1-04 CGCTTGCAGTTTCATTTGATGCTCGATGAGTTTTTCTAATAAGCTGGCCATCGGGGCGCG 60  
 RP1-05 CGCTTGCAGTTTCATTTGATGCTCGATGAGTTTTTCTAATAAGCTAGCCATCGGGGCGCG 60  
 RP1-06 CGCTTGCAGTTTCATTTGATGCTCGATGAGTTTTTCTAATAAGCTAGCCATCGGGGCGCG 60  
 RP1-07 CGCTTGCAGTTTCATTTGGTGCTCGATGAGTTTTTCTAGTAAGCTCGCCATCGGGGCGCG 60  
 RP1-08 CGCTTGCAGTTTCATTTGATGCTCGATGAGTTTTTCTAGTAAGCTGGCCATCGGGGCGCG 60  
 RP1-09 CGCTTGCAGTTTCATTTGATGCTCGATGAGTTTTTCTAATAGGCTGGCCATCGGGGCGCG 60  
 RP1-10 CGCTTGCAGTTTCATTTGTTGCTCGATGAGTTTTTCTAATAAGCTAGCCGTCGGGGCGCG 60

\*\*\*\*\* \*\*\*\*\*  
 Regenerated *Kan<sup>R</sup>* 3' end GC

KmHP CGGCGTCTGTGACCACCTGATTCTTGAGTAGCGGGGCCGAAAGGCCCCGC 110  
 RP1-01 CGGCGTCTGTGACCACCTGATTCTTGAGTAGCGGGGCCGAAAGGCCCCGC 110  
 RP1-02 CGGCGTCTGTGACCACCTGATTCTTGAGTAGCGGGGCCGAAAGGCCCCGC 110  
 RP1-03 CGGCGTCTGTGACCACCTGATTCTTGAGTAGCGGGGCCGAAAGGCCCCGC 110  
 RP1-04 CGGCGTCTGTGACCACCTGATTCTTGAGTAGCGGGGCCGAAAGGCCCCGC 110  
 RP1-05 CGGCGTCTGTGACCACCTGATTCTTGAGTAGCGGGGCCGAAAGGCCCCGC 110  
 RP1-06 CGGCGTCTGTGACCACCTGATTCTTGAGTAGCGGGGCCGAAAGGCCCCGC 110  
 RP1-07 CGGCGTCTGTGACCACCTGATTCTTGAGTAGCGGGGCCGAAAGGCCCCGC 110  
 RP1-08 CGGCGTCTGTGACCACCTGATTCTTGAGTAGCGGGGCCGAAAGGCCCCGC 110  
 RP1-09 CGGCGTCTGTGACCACCTGATTCTTGAGTAGCGGGGCCGAAAGGCCCCGC 110  
 RP1-10 CGGCGTCTGTGACCACCTGATTCTTGAGTAGCGGGGCCGAAAGGCCCCGC 110

\*\*\*\*\*  
 WT Hairpin
