# Supplementary material for: Target Site Recognition by a Diversity-Generating Retroelement
Source: PubMed Central journal article supplement (PMC3240598; doi:10.1371/journal.pgen.1002414), 2011-12-15
Supplement: pgen.1002414.s010.pdf [file pgen.1002414.s010.pdf]

KmHP CGCTTGCAGTTTCATTTGATGCTCGATGAGTTTTTCTAATAAGCTAGCCATCGGGGCGCG 60  
 RP2-01 CGCTTGCAGTTTCATTTGATGCTCGATGAGTTTTTCTAATAAGCTAGCCATCGGGGCGCG 60  
 RP2-02 CGCTTGCAGTTTCATTTGATGCTCGATGAGTTTTTCTAATGGGCTAGCCATCGGGGCGCG 60  
 RP2-03 CGCTTGCAGTTTCATTTGATGCTCGATGAGTTTTTCTAATAAGCTAGCCATCGGGGCGCG 60  
 RP2-04 CGCTTGCAGTTTCATTTGATGCTCGATGAGTTTTTCTAATAAGCTAGCCATCGGGGCGCG 60  
 RP2-05 CGCTTGCAGTTTCATTTGATGCTCGATGAGTTTTTCTAATAGGCTAGCCATCGGGGCGCG 60  
 RP2-06 CGCTTGCAGTTTCATTTGGTGCTCGATGAGTTTTTCTAATAAGCTAGGCCTCGGGGCGCG 60  
 RP2-07 CGCTTGCAGTTTCATTTGCTGCTCGATGAGTTTTTCTAATGGGCTGGCCGTCGGGGCGCG 60  
 RP2-08 CGCTTGCAGTTTCATTTGATGCTCGATGAGTTTTTCTAATAAGCTAGCCATCGGGGCGCG 60  
 RP2-09 CGCTTGCAGTTTCATTTGATGCTCGATGAGTTTTTCTAATAAGCTAGCCATCGGGGCGCG 60  
 RP2-10 CGCTTGCAGTTTCATTTGATGCTCGATGAGTTTTTCTAGTAAGCTGGCCATCGGGGCGCG 60  
 RP2-11 CGCTTGCAGTTTCATTTGATGCTCGATGAGTTTTTCTAGTAAGCTAGCCATCGGGGCGCG 60

\*\*\*\*\*  
 Regenerated *Kan<sup>R</sup>* 3' end GC \*\*\*\*\*

KmHP CGGCGTCTGTGACCACCTGATTCTTGAGTAGCGGGGCCGAAAGGCCCGC 110  
 RP2-01 CGGCGTCTGTGACCACCTGATTCTTGAGTAGCGGGGCCGAAAGGCCCGC 110  
 RP2-02 CGGCGTCTGTGACCACCTGATTCTTGAGTAGCGGGGCCGAAAGGCCCGC 110  
 RP2-03 CGGCGTCTGTGACCACCTGATTCTTGAGTAGCGGGGCCGAAAGGCCCGC 110  
 RP2-04 CGGCGTCTGTGACCACCTGATTCTTGAGTAGCGGGGCCGAAAGGCCCGC 110  
 RP2-05 CGGCGTCTGTGACCACCTGATTCTTGAGTAGCGGGGCCGAAAGGCCCGC 110  
 RP2-06 CGGCGTCTGTGACCACCTGATTCTTGAGTAGCGGGGCCGAAAGGCCCGC 110  
 RP2-07 CGGCGTCTGTGACCACCTGATTCTTGAGTAGCGGGGCCGAAAGGCCCGC 110  
 RP2-08 CGGCGTCTGTGACCACCTGATTCTTGAGTAGCGGGGCCGAAAGGCCCGC 110  
 RP2-09 CGGCGTCTGTGACCACCTGATTCTTGAGTAGCGGGGCCGAAAGGCCCGC 110  
 RP2-10 CGGCGTCTGTGACCACCTGATTCTTGAGTAGCGGGGCCGAAAGGCCCGC 110  
 RP2-11 CGGCGTCTGTGACCACCTGATTCTTGAGTAGCGGGGCCGAAAGGCCCGC 110

\*\*\*\*\*  
 WT Hairpin
