# Supplementary material for: Target Site Recognition by a Diversity-Generating Retroelement
Source: PubMed Central journal article supplement (PMC3240598; doi:10.1371/journal.pgen.1002414), 2011-12-15
Supplement: pgen.1002414.s011.pdf [file pgen.1002414.s011.pdf]

KmHP CGCTTGCAGTTTCATTTGATGCTCGATGAGTTTTTCTAATAAGCTAGCCATCGGGGCGCG 60  
 LY1-01 CGCTTGCAGTTTCATTTGATGCTCGATGAGTTTTTCTAGTGAGCTAGCCATCGGGGCGCG 60  
 LY1-02 CGCTTGCAGTTTCATTTGATGCTCGGTGAGTTTTTCTAATAAGCTAGCCATCGGGGCGCG 60  
 LY1-03 CGCTTGCAGTTTCATTTGATGCTCGGTGAGTTTTTCTAATGGGCTAGCCATCGGGGCGCG 60  
 LY1-04 CGCTTGCAGTTTCATTTGTTGCTCGATGAGTTTTTCTAATGAGCTAGCCATCGGGGCGCG 60  
 LY1-05 CGCTTGCAGTTTCATTTGATGCTCGGTGAGTTTTTCTAATAAGCTAGCCTTCGGGGCGCG 60  
 LY1-06 CGCTTGCAGTTTCATTTGATGCTCGATGAGTTTTTCTAATGAGCTAGCCATCGGGGCGCG 60  
 LY1-07 CGCTTGCAGTTTCATTTGATGCTCGATGAGTTTTTCTAATGAGCTAGCCATCGGGGCGCG 60  
 LY1-08 CGCTTGCAGTTTCATTTGTTGCTCGATGAGTTTTTCTAGTAAGCTAGCCCTCGGGGCGCG 60  
 LY1-09 CGCTTGCAGTTTCATTTGATGCTCGATGAGTTTTTCTAGTAAGCTAGCCATCGGGGCGCG 60  
 LY1-10 CGCTTGCAGTTTCATTTGATGCTCGATGAGTTTTTCTAATAAGCTAGCCATCGGGGCGCG 60  
 LY1-11 CGCTTGCAGTTTCATTTGTTGCTCGATGAGTTTTTCTAATAAGCTAGCCATCGGGGCGCG 60  
 LY1-12 CGCTTGCAGTTTCATTTGATGCTCGGTGAGTTTTTCTAATAAGCTAGCCATCGGGGCGCG 60  
 LY1-13 CGCTTGCAGTTTCATTTGATGCTCGATGAGTTTTTCTAGTAAGCTAGCCATCGGGGCGCG 60  
 LY1-14 CGCTTGCAGTTTCATTTGATGCTCGATGAGTTTTTCTAATAAGCTAGCCATCGGGGCGCG 60  
 LY1-15 CGCTTGCAGTTTCATTTGATGCTCGATGAGTTTTTCTAATAAGCTAGCCATCGGGGCGCG 60  
 LY1-16 CGCTTGCAGTTTCATTTGATGCTCGATGAGTTTTTCTAATAAGCTAGCCGTCGGGGCGCG 60

\*\*\*\*\*  
 Regenerated *Kan<sup>R</sup>* 3' end GC

KmHP CGGCGTCTGTGACCACCTGATTCTTGAGTAGCGGGGCCGAAAGGCCCCGC 110  
 LY1-01 CGGCGTCTGTGACCACCTGATTCTTGAGTAGCGGGGCCGAAAGGCCCCGC 110  
 LY1-02 CGGCGTCTGTGACCACCTGATTCTTGAGTAGCGGGGCCGAAAGGCCCCGC 110  
 LY1-03 CGGCGTCTGTGACCACCTGATTCTTGAGTAGCGGGGCCGAAAGGCCCCGC 110  
 LY1-04 CGGCGTCTGTGACCACCTGATTCTTGAGTAGCGGGGCCGAAAGGCCCCGC 110  
 LY1-05 CGGCGTCTGTGACCACCTGATTCTTGAGTAGCGGGGCCGAAAGGCCCCGC 110  
 LY1-06 CGGCGTCTGTGACCACCTGATTCTTGAGTAGCGGGGCCGAAAGGCCCCGC 110  
 LY1-07 CGGCGTCTGTGACCACCTGATTCTTGAGTAGCGGGGCCGAAAGGCCCCGC 110  
 LY1-08 CGGCGTCTGTGACCACCTGATTCTTGAGTAGCGGGGCCGAAAGGCCCCGC 110  
 LY1-09 CGGCGTCTGTGACCACCTGATTCTTGAGTAGCGGGGCCGAAAGGCCCCGC 110  
 LY1-10 CGGCGTCTGTGACCACCTGATTCTTGAGTAGCGGGGCCGAAAGGCCCCGC 110  
 LY1-11 CGGCGTCTGTGACCACCTGATTCTTGAGTAGCGGGGCCGAAAGGCCCCGC 110  
 LY1-12 CGGCGTCTGTGACCACCTGATTCTTGAGTAGCGGGGCCGAAAGGCCCCGC 110  
 LY1-13 CGGCGTCTGTGACCACCTGATTCTTGAGTAGCGGGGCCGAAAGGCCCCGC 110  
 LY1-14 CGGCGTCTGTGACCACCTGATTCTTGAGTAGCGGGGCCGAAAGGCCCCGC 110  
 LY1-15 CGGCGTCTGTGACCACCTGATTCTTGAGTAGCGGGGCCGAAAGGCCCCGC 110  
 LY1-16 CGGCGTCTGTGACCACCTGATTCTTGAGTAGCGGGGCCGAAAGGCCCCGC 110

\*\*\*\*\*  
 WT Hairpin
