# Supplementary material for: Target Site Recognition by a Diversity-Generating Retroelement
Source: PubMed Central journal article supplement (PMC3240598; doi:10.1371/journal.pgen.1002414), 2011-12-15
Supplement: pgen.1002414.s012.pdf [file pgen.1002414.s012.pdf]

KmHP CGCTTGCAGTTTCATTTGATGCTCGATGAGTTTTTCTAATAAGCTAGCCATCGGGGCGCG 60  
 LY2-01 CGCTTGCAGTTTCATTTGATGCTCGATGAGTTTGTCTAATAGGCTAGCCATCGGGGCGCG 60  
 LY2-02 CGCTTGCAGTTTCATTTGATGCTCGATGAGTTTTTCTAGTAAGCTAGCCATCGGGGCGCG 60  
 LY2-03 CGCTTGCAGTTTCATTTGATGCTCGATGAGTTTTTCTAATAAGCTAGCCATCGGGGCGCG 60  
 LY2-04 CGCTTGCAGTTTCATTTGATGCTCGATGAGTTTTTCTAATGAGCTAGCCATCGGGGCGCG 60  
 LY2-05 CGCTTGCAGTTTCATTTGATGCTCGATGAGTTTTTCTAGTAAGCTAGCCATCGGGGCGCG 60  
 LY2-06 CGCTTGCAGTTTCATTTGATGCTCGCTGAGTTTTTCTAGTAAGCTAGCCATCGGGGCGCG 60  
 LY2-07 CGCTTGCAGTTTCATTTGATGCTCGATGAGTTTTTCTAATAAGCTAGCCATCGGGGCGCG 60  
 LY2-08 CGCTTGCAGTTTCATTTGATGCTCGATGAGTTTTTCTAATGGGCTAGCCATCGGGGCGCG 60  
 LY2-09 CGCTTGCAGTTTCATTTGATGCTCGATGAGTTTTTCTAGTGGGCTGGCCATCGGGGCGCG 60  
 LY2-10 CGCTTGCAGTTTCATTTGTTGCTCGATGAGTTTTTCTAATAAGCTAGCCATCGGGGCGCG 60  
 LY2-11 CGCTTGCAGTTTCATTTGATGCTCGATGAGTTTTTCTGATAAGCTAGCCATCGGGGCGCG 60  
 LY2-12 CGCTTGCAGTTTCATTTGATGCTCGATGAGTTTTTCTAGTAAGCTAGCCATCGGGGCGCG 60  
 LY2-13 CGCTTGCAGTTTCATTTGATGCTCGGTGAGTTTTTCTAATGAGCTAGCCATCGGGGCGCG 60  
 LY2-14 CGCTTGCAGTTTCATTTGATGCTCGATGAGTTTTTCTAGTAAGCTAGCCCTCGGGGCGCG 60  
 LY2-15 CGCTTGCAGTTTCATTTGTTGCTCGATGAGTTTTTCTAATAAGCTAGCCATCGGGGCGCG 60  
 LY2-16 CGCTTGCAGTTTCATTTGATGCTCGATGAGTTTTTCTAATAAGCTAGCCATCGGGGCGCG 60

\*\*\*\*\*  
 \*\*\*\*\* \* \* \* \* \*  
 \*\*\*\*\*

Regenerated *Kan<sup>R</sup>* 3' end

G/C

KmHP CGGCGTCTGTGACCACCTGATTCTTGAGTAGCGGGGCCGAAAGGCCCGC 110  
 LY2-01 CGGCGTCTGTGACCACCTGATTCTTGAGTAGCGGGGCCGAAAGGCCCGC 110  
 LY2-02 CGGCGTCTGTGACCACCTGATTCTTGAGTAGCGGGGCCGAAAGGCCCGC 110  
 LY2-03 CGGCGTCTGTGACCACCTGATTCTTGAGTAGCGGGGCCGAAAGGCCCGC 110  
 LY2-04 CGGCGTCTGTGACCACCTGATTCTTGAGTAGCGGGGCCGAAAGGCCCGC 110  
 LY2-05 CGGCGTCTGTGACCACCTGATTCTTGAGTAGCGGGGCCGAAAGGCCCGC 110  
 LY2-06 CGGCGTCTGTGACCACCTGATTCTTGAGTAGCGGGGCCGAAAGGCCCGC 110  
 LY2-07 CGGCGTCTGTGACCACCTGATTCTTGAGTAGCGGGGCCGAAAGGCCCGC 110  
 LY2-08 CGGCGTCTGTGACCACCTGATTCTTGAGTAGCGGGGCCGAAAGGCCCGC 110  
 LY2-09 CGGCGTCTGTGACCACCTGATTCTTGAGTAGCGGGGCCGAAAGGCCCGC 110  
 LY2-10 CGGCGTCTGTGACCACCTGATTCTTGAGTAGCGGGGCCGAAAGGCCCGC 110  
 LY2-11 CGGCGTCTGTGACCACCTGATTCTTGAGTAGCGGGGCCGAAAGGCCCGC 110  
 LY2-12 CGGCGTCTGTGACCACCTGATTCTTGAGTAGCGGGGCCGAAAGGCCCGC 110  
 LY2-13 CGGCGTCTGTGACCACCTGATTCTTGAGTAGCGGGGCCGAAAGGCCCGC 110  
 LY2-14 CGGCGTCTGTGACCACCTGATTCTTGAGTAGCGGGGCCGAAAGGCCCGC 110  
 LY2-15 CGGCGTCTGTGACCACCTGATTCTTGAGTAGCGGGGCCGAAAGGCCCGC 110  
 LY2-16 CGGCGTCTGTGACCACCTGATTCTTGAGTAGCGGGGCCGAAAGGCCCGC 110

\*\*\*\*\*

WT Hairpin
