# Supplementary material for: Target Site Recognition by a Diversity-Generating Retroelement
Source: PubMed Central journal article supplement (PMC3240598; doi:10.1371/journal.pgen.1002414), 2011-12-15
Supplement: pgen.1002414.s013.pdf [file pgen.1002414.s013.pdf]

KmHP CGCTTGCAGTTTCATTTGATGCTCGATGAGTTTTTCTAATAAGCTAGCCATCGGGGCGCG 60  
 PL1-01 CGCTTGCAGTTTCATTTGATGCTCGATGAGTTTTTCTAATAAGCTAGCCATCGGGGCGCG 60  
 PL1-02 CGCTTGCAGTTTCATTTGATGCTCGCTGAGTTTTTCTAGTTTGCTAGCCCTCGGGGCGCG 60  
 PL1-03 CGCTTGCAGTTTCATTTGATGCTCGATGAGTTTTTCTAATGGGCTAGCCATCGGGGCGCG 60  
 PL1-04 CGCTTGCAGTTTCATTTGGTGCTCGATGAGTTTTTCTAATGAGCTAGCCATCGGGGCGCG 60  
 PL1-05 CGCTTGCAGTTTCATTTGATGCTCGGTGAGTTTTTCTAATCTGCTAGCCATCGGGGCGCG 60  
 PL1-06 CGCTTGCAGTTCCATTTGATGCTCGGTGAGTTTTTCTAATAAGCTGGCCATCGGGGCGCG 60  
 PL1-07 CGCTTGCAGTTTCATTTGATGCTCGTTGAGTTTTTCTAATAAGCTAGCCATCGGGGCGCG 60

\*\*\*\*\* \*\*\*\*\* \*\*\*\*\* \*\*\*\*\* \* \*\*\* \*\* \*\*\*\*\*

Regenerated *Kan<sup>R</sup>* 3' end

GC

KmHP CGGCGTCTGTGACCACCTGATTCTTGAGTAGCGGGCCGAAAGGCCCGC 110  
 PL1-01 CGGCGTCTGTGACCACCTGATTCTTGAGTAGCGGGCCGAAAGGCCCGC 110  
 PL1-02 CGGCGTCTGTGACCACCTGATTCTTGAGTAGCGGGCCGAAAGGCCCGC 110  
 PL1-03 CGGCGTCTGTGACCACCTGATTCTTGAGTAGCGGGCCGAAAGGCCCGC 110  
 PL1-04 CGGCGTCTGTGACCACCTGATTCTTGAGTAGCGGGCCGAAAGGCCCGC 110  
 PL1-05 CGGCGTCTGTGACCACCTGATTCTTGAGTAGCGGGCCGAAAGGCCCGC 110  
 PL1-06 CGGCGTCTGTGACCACCTGATTCTTGAGTAGCGGGCCGAAAGGCCCGC 110  
 PL1-07 CGGCGTCTGTGACCACCTGATTCTTGAGTAGCGGGCCGAAAGGCCCGC 110

\*\*\*\*\*  
 \*\*\*\*\*

WT Hairpin
