# Supplementary material for: Target Site Recognition by a Diversity-Generating Retroelement
Source: PubMed Central journal article supplement (PMC3240598; doi:10.1371/journal.pgen.1002414), 2011-12-15
Supplement: pgen.1002414.s014.pdf [file pgen.1002414.s014.pdf]

KmHP CGCTTGCAGTTTCATTTGATGCTCGATGAGTTTTTCTAATAAGCTAGCCATCGGGGCGCG 60  
 PL2-01 CGCTTGCAGTTTCATTTGATGCTCGGTGAGTTTTTCTAATAAGCTAGCCATCGGGGCGCG 60  
 PL2-02 CGCTTGCAGTTTCATTTGATGCTCGATGAGTTTTTCTAATGGGCTAGCCATCGGGGCGCG 60  
 PL2-03 CGCTTGCAGTTTCATTTGATGCTCGATGAGTTTTTCTAATAAGCTAGCCATCGGGGCGCG 60  
 PL2-04 CGCTTGCAGTTTCATTTGATGCTCGATGAGTTTTTCTAGTAAGCTGGCCATCGGGGCGCG 60  
 PL2-05 CGCTTGCAGTTTCATTTGTTGCTCGATGAGTTTTTCTAATAAGCTGGCCGTCGGGGCGCG 60  
 PL2-06 CGCTTGCAGTTTCATTTGATGCTCGATGAGTTTTTCTGATGGGCTGGCCATCGGGGCGCG 60  
 PL2-07 CGCTTGCAGTTTCATTTGATGCTCGGTGAGTTTTTCTAGTAAGCTAGCCATCGGGGCGCG 60  
 PL2-08 CGCTTGCAGTTTCATTTGATGCTCGATGAGTTTTTCTAATGAGCTAGCCATCGGGGCGCG 60  
 PL2-09 CGCTTGCAGTTTCATTTGATGCTCGATGAGTTTTTCTAGTAAGGTAGCCGTCGGGGCGCG 60  
 PL2-10 CGCTTGCAGTTTCATTTGATGCTCGATGAGTTTTTCTAATAAGCTGGCCATCGGGGCGCG 60

\*\*\*\*\*  
\*\*\*\*\* \* \* \* \* \* \*\*\*\*\*  
 Regenerated *Kan<sup>R</sup>* 3' end GC

KmHP CGGCGTCTGTGACCACCTGATTCTTGAGTAGCGGGGCCGAAAGGCCCCGC 110  
 PL2-01 CGGCGTCTGTGACCACCTGATTCTTGAGTAGCGGGGCCGAAAGGCCCCGC 110  
 PL2-02 CGGCGTCTGTGACCACCTGATTCTTGAGTAGCGGGGCCGAAAGGCCCCGC 110  
 PL2-03 CGGCGTCTGTGACCACCTGATTCTTGAGTAGCGGGGCCGAAAGGCCCCGC 110  
 PL2-04 CGGCGTCTGTGACCACCTGATTCTTGAGTAGCGGGGCCGAAAGGCCCCGC 110  
 PL2-05 CGGCGTCTGTGACCACCTGATTCTTGAGTAGCGGGGCCGAAAGGCCCCGC 110  
 PL2-06 CGGCGTCTGTGACCACCTGATTCTTGAGTAGCGGGGCCGAAAGGCCCCGC 110  
 PL2-07 CGGCGTCTGTGACCACCTGATTCTTGAGTAGCGGGGCCGAAAGGCCCCGC 110  
 PL2-08 CGGCGTCTGTGACCACCTGATTCTTGAGTAGCGGGGCCGAAAGGCCCCGC 110  
 PL2-09 CGGCGTCTGTGACCACCTGATTCTTGAGTAGCGGGGCCGAAAGGCCCCGC 110  
 PL2-10 CGGCGTCTGTGACCACCTGATTCTTGAGTAGCGGGGCCGAAAGGCCCCGC 110

\*\*\*\*\*  
\*\*\*\*\*  
 WT Hairpin
